# Supplementary material
Source: ML conference proceedings conference paper supplement (https://openaccess.thecvf.com/content/cvpr_2016/html/Ouyang_ForgetMeNot_Memory-Aware_Forensic_2016_CVPR_paper.html)
Supplement: Supplementary file 1 [file Ouyang_ForgetMeNot_Memory-Aware_Forensic_2016_CVPR_supplemental.pdf]

Table 1. Photo-sketch matching on the memory gap database (Rank 1 accuracy, %). Comparing MTL-GPR, GPR, Polynomial MTL, Polynomial SVR, Linear Regr. and NN. Sketch input is given by column and matched with model trained on corresponding cell of MGDB. Average accuracies and standard deviations were measured over 15 random splits of 68 training subjects and 32 testing subjects(subjects in training and testing sets are different).

| Accuracy | Viewed          |          |          |          |          |          | 1 Hour          |          |          |          |          |          | 24 Hour         |          |          |          |          |          | Unviewed        |          |          |          |          |          |
|----------|-----------------|----------|----------|----------|----------|----------|-----------------|----------|----------|----------|----------|----------|-----------------|----------|----------|----------|----------|----------|-----------------|----------|----------|----------|----------|----------|
|          | MG              | G-       | PM       | PS       | LR       | NN       | MG-             | G-       | PM       | PS       | LR       | NN       | MG              | G-       | PM       | PS       | LR       | NN       | MG              | G-       | PM       | PS       | LR       | NN       |
| Photo    | <b>99.2±1.8</b> | 88.1±4.6 | 88.2±3.2 | 90.0±4.1 | 53.3±4.3 | 71.4±6.7 | <b>96.6±1.8</b> | 70.0±2.8 | 65.2±5.5 | 56.1±8.6 | 39.0±5.7 | 51.6±6.7 | <b>90.3±3.9</b> | 55.2±4.2 | 50.3±6.4 | 52.2±6.3 | 32.2±8.9 | 31.5±5.8 | <b>86.0±6.7</b> | 35.4±5.6 | 35.5±3.9 | 38.4±7.9 | 34.3±5.7 | 21.2±6.7 |
| Viewed   | -               | -        | -        | -        | -        | -        | <b>90.2±5.6</b> | 58.4±4.6 | 63.2±6.7 | 66.4±5.5 | 52.3±2.8 | 51.6±6.7 | <b>86.6±4.5</b> | 57.5±5.0 | 44.2±7.2 | 46.4±7.8 | 26.2±7.8 | 31.5±5.8 | <b>73.5±8.9</b> | 33.4±2.1 | 32.2±3.4 | 38.3±7.9 | 24.4±8.3 | 21.2±6.7 |
| 1 Hour   | -               | -        | -        | -        | -        | -        | -               | -        | -        | -        | -        | -        | <b>69.6±6.4</b> | 41.2±3.1 | 44.3±6.3 | 45.3±6.0 | 26.0±9.4 | 31.5±5.8 | <b>63.1±6.4</b> | 32.3±7.2 | 29.0±4.2 | 35.2±6.9 | 18.2±6.0 | 21.2±6.7 |
| 24 Hour  | -               | -        | -        | -        | -        | -        | -               | -        | -        | -        | -        | -        | -               | -        | -        | -        | -        | -        | <b>42.0±4.2</b> | 30.2±5.6 | 30.1±8.3 | 32.3±4.5 | 18.0±6.2 | 21.2±6.7 |

Table 2. The importance of Bayesian memory modelling: Rank 1 MGDB match results (%) without/with reconstruction confidence. Average accuracies and standard deviations were measured over 15 random splits of 68 training subjects and 32 testing subjects(subjects in training and testing sets are different).

| Accuracy | Viewed              | 1h                  | 24h                 | Unviewed            |
|----------|---------------------|---------------------|---------------------|---------------------|
| photo    | 86.0±5.2 / 99.2±1.8 | 85.6±3.2 / 96.6±1.8 | 60.1±3.6 / 90.3±3.9 | 50.0±2.3 / 86.0±6.7 |
| Viewed   | -                   | 56.5±4.2 / 90.2±5.6 | 43.3±3.0 / 86.6±4.5 | 40.0±2.5 / 73.5±8.9 |
| 1h       | -                   | -                   | 38.0±3.0 / 69.6±6.4 | 36.2±2.5 / 63.1±6.4 |
| 24h      | -                   | -                   | -                   | 28.0±4.0 / 42.0±4.2 |

Table 3. Matching results (Rank 1 accuracy, %) on forensic sketch database (1/3 test split) using MTL-GPR / STL-GPR. Compare: 21% from [1] and 9% by direct HoG matching. Average accuracies and standard deviations were measured over 15 random splits of 68 training subjects and 32 testing subjects(subjects in training and testing sets are different).

| Accuracy | Viewed            | 1h                  | 24h                 | Unviewed            |
|----------|-------------------|---------------------|---------------------|---------------------|
| Photo    | 22.3±2.6 / 35±3.6 | 22.2±5.2 / 34.0±6.8 | 15.4±3.2 / 40.2±3.3 | 18.0±3.6 / 41.3±3.6 |
| Viewed   | -                 | 65.4±2.6 / 48.5±8.2 | 40.1±4.2 / 50.1±7.2 | 33.3±3.6 / 48.0±2.8 |
| 1h       | -                 | -                   | 78.6±3.4 / 48.4±3.6 | 54.9±6.2 / 40.3±3.2 |
| 24h      | -                 | -                   | -                   | 65.2±8.2 / 42.3±3.6 |

## References

- [1] S. Ouyang, T. M. Hospedales, Y.-Z. Song, and X. Li. Cross-modal face matching: Beyond viewed sketches. In *ACCV*, 2014.
